# Supplementary material
Source: Research Square preprint supplement (doi:10.21203/rs.3.rs-9401005/v1)
Supplement: Supplementary file 2 [file d77888333d7148b0287f70e5.docx]

**Appendix:**

**Questionnaire:**

**Healthcare Professionals Questionnaire on Hematopoietic Stem Cell Donation**

This survey is conducted to explore healthcare professionals' knowledge and attitudes regarding hematopoietic stem cell donation.

**Section 1: Consent Form**

Participation is **voluntary**, and your responses will remain **confidential and anonymous**.

By proceeding, you confirm that you have read the information above and agree to participate in this study.

You may withdraw at any time before submitting your responses.

**Do you consent to participate in this survey?**

Yes, I agree to participate.

No, I do not wish to participate.

**Section 2: Demographics**

This section gathers background information on healthcare providers to enable analysis across specialties, experience levels, and demographic groups.

1. **Saudi Arabia Region:**

- Central
- Western
- Eastern
- Northern
- Southern

1. **Gender:**
   - Male
   - Female
2. **Profession/Specialty**:

- Doctor (MD, PhD, General Practitioner)
- Dentist
- Pharmacist
- Nurse
- Allied medical sciences (Consultant, Specialist, technician)
- Senior Medical Students (students in the upper levels studying specialized program subjects)
- Senior Medical Students (students in the upper levels, internship and students studying specialized program subjects)
- Junior Medical Students (students in the early levels studying basic sciences and general subjects)

1. **Years of Experience in Healthcare:**
   - 0 years
   - 1-5 years
   - 6-10 years
   - 11-15 years
   - More than 15 years

**Section 3: Experience with HSC donation**

This section evaluates the Experience of healthcare providers with HSC donation.

*(For each statement, please indicate whether it is Yes, No, or if you Don't Know.)*

| **Statements** | **Yes** | **No** | **N/A** |
| --- | --- | --- | --- |
| 1. I would personally be willing to register as a hematopoietic stem cell donor. |  |  |  |
| 1. If a family member of mine needed a bone marrow transplant and I was a match, I would be willing to donate my stem cells to them. |  |  |  |
| 1. I am willing to donate stem cells to any patient I may match. |  |  |  |

**Section 4: Knowledge Assessment**

This section evaluates the provider's understanding of the clinical and procedural aspects of hematopoietic stem cell donation.

*(For each statement, please indicate whether it is True, False, or if you Don't Know.)*

| **Statements** | **Yes** | **No** | **N/A** |
| --- | --- | --- | --- |
| 1. If I am not able to donate blood, I cannot donate bone marrow. |  |  |  |
| 1. Hematopoietic stem cells can only be collected from bone marrow. |  |  |  |
| 1. Peripheral blood stem cell (PBSC) donation requires general anesthesia. |  |  |  |
| 1. Donors must be a close relative of the recipient. |  |  |  |
| 1. A common side effect of G-CSF injections for PBSC donation is bone pain. |  |  |  |
| 1. The human leukocyte antigen (HLA) system is critical for matching donors and recipients. |  |  |  |
| 1. The human leukocyte antigen (HLA) system is critical for matching donors and recipients. |  |  |  |

**Section 5: Attitude Assessment**

This section uses a Likert scale to gauge providers' attitudes, beliefs, and perceptions regarding stem cell donation.

*(Please indicate your level of agreement with the following statements.)*

| **Statements** | **Strongly agree** | **Agree** | **Neutral** | **Disagree** | **Strongly disagree** |
| --- | --- | --- | --- | --- | --- |
| 1. I feel confident in my ability to explain the stem cell donation process to a potential donor. |  |  |  |  |  |
| 1. The risks for a healthy individual donating stem cells are minimal. |  |  |  |  |  |
| 1. Encouraging hematopoietic stem cell donation is an important part of my professional role. |  |  |  |  |  |
| 1. Our healthcare system provides adequate resources and support for stem cell donors. |  |  |  |  |  |
| 1. Cultural, religious, and ethical issues are less significant barriers to donation in our community. |  |  |  |  |  |

**Section 6: Perceived Barriers and Practices**

This section explores the provider's perception of barriers to donation and their current practices.

| **Statements** | **Strongly agree** | **Agree** | **Neutral** | **Disagree** | **Strongly disagree** |
| --- | --- | --- | --- | --- | --- |
| 1. Lack of Awareness and Fundamental Knowledge |  |  |  |  |  |
| 1. Fear of the Donation Process |  |  |  |  |  |
| 1. The time commitment of stem cell donation. |  |  |  |  |  |
| 1. The financial cost of stem cell donation. |  |  |  |  |  |
| 1. The pain of stem cell donation. |  |  |  |  |  |
| 1. The long-term side effects of stem cell donation. |  |  |  |  |  |

**Section 7: Recommended resources or training to increase the awareness**

1. **What resources or training would be most helpful to you in facilitating conversations about stem cell donation?** (Select all that apply)
   - Updated educational materials (brochures, videos)
   - Continuing medical education (CME) courses or workshops
   - Communication skills training
